# Supplementary material for: CSN1S1, CSN3 and LPL: Three Validated Gene Polymorphisms Useful for More Sustainable Dairy Production in the Mediterranean River Buffalo
Source: MDPI journal article supplement (doi:10.3390/ani14101414), 2024-05-09
Supplement: s1 [file s1]

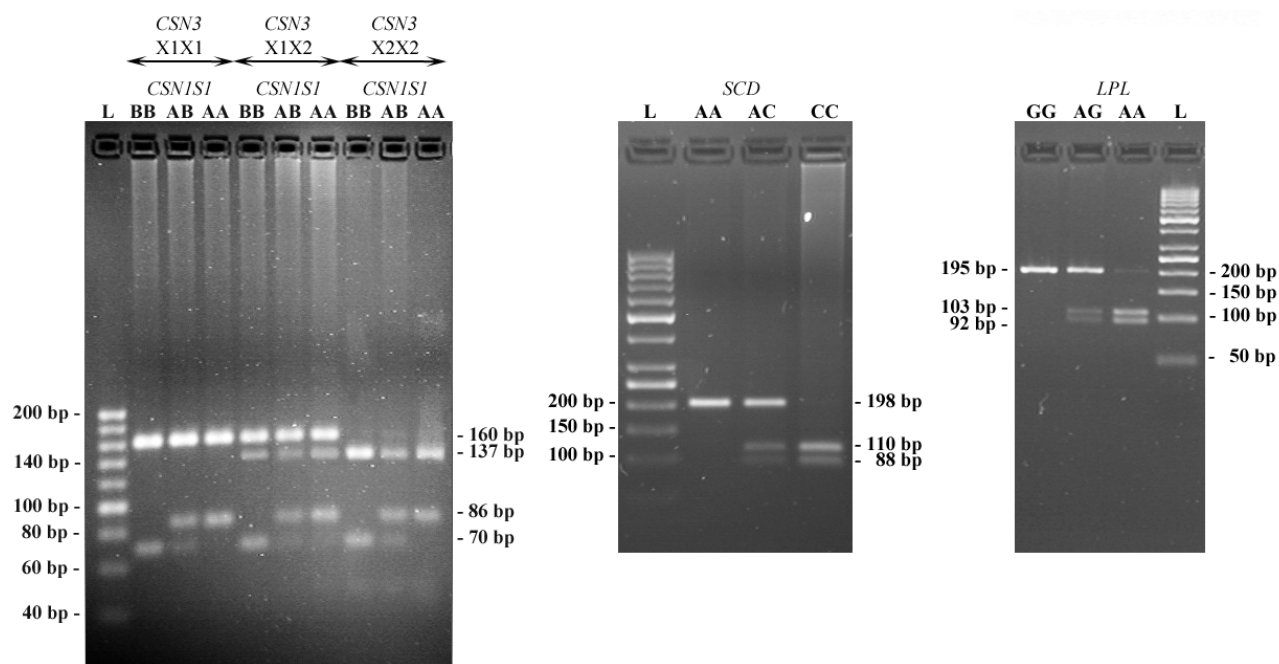

**Figure S1.** Genotyping by duplex ACRS-PCR (*CSN1S1* and *CSN3*) and PCR-RFLP (*LPL* and *SCD*) for the four investigated SNPs (*CSN1S1* = AJ005430:c.578C>T; *CSN3* = HQ677596:c.536C>T; *LPL* = AWWX01438720.1:g14229A>G and *SCD* = FM876222:g.133A>C).

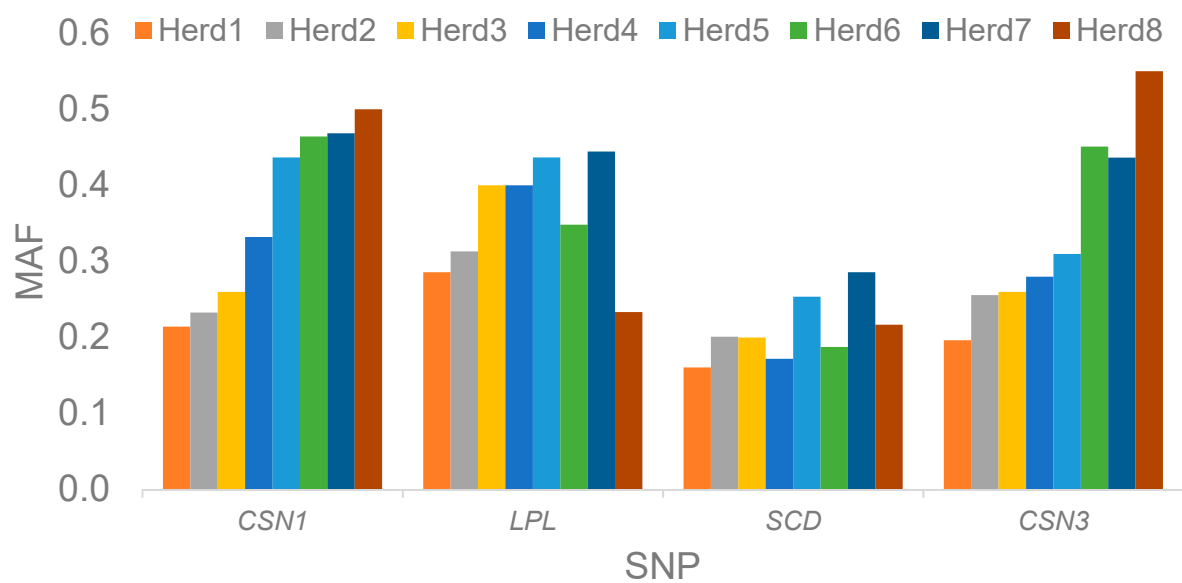

**Figure S2.** Minor allele frequencies (MAF) detected in the eight investigated herds for the four SNPs (*CSN1SI* = AJ005430:c.578C>T; *CSN3* = HQ677596:c.536C>T; *SCD* = FM876222:g.133A>C; *LPL* = AWWX01438720.1:g14229A>G).

**Table S1.** Within herd genotypic frequency, observed and expected heterozygosity and p-values for Hardy-Weinberg tests for the four investigated SNPs.

| Herd | Gene <sup>1</sup> | A | B | Geno      | O(het) | E(het) | P            |
|------|-------------------|---|---|-----------|--------|--------|--------------|
| 1    | <i>CSN1S1</i>     | T | C | 0/12/15   | 0.44   | 0.35   | 0.289        |
| 1    | <i>CSN3</i>       | T | C | 0/11/16   | 0.41   | 0.32   | 0.549        |
| 1    | <i>SCD</i>        | C | A | 1/5/21    | 0.19   | 0.23   | 0.358        |
| 1    | <i>LPL</i>        | A | G | 1/14/12   | 0.52   | 0.42   | 0.367        |
| 2    | <i>CSN1S1</i>     | T | C | 7/53/91   | 0.35   | 0.35   | 1.000        |
| 2    | <i>CSN3</i>       | T | C | 6/63/82   | 0.42   | 0.37   | 0.193        |
| 2    | <i>SCD</i>        | C | A | 12/37/102 | 0.25   | 0.32   | <b>0.005</b> |
| 2    | <i>LPL</i>        | A | G | 10/70/71  | 0.46   | 0.42   | 0.244        |
| 3    | <i>CSN1S1</i>     | T | C | 0/12/11   | 0.52   | 0.39   | 0.270        |
| 3    | <i>CSN3</i>       | T | C | 0/12/11   | 0.52   | 0.39   | 0.270        |
| 3    | <i>SCD</i>        | C | A | 01/07/15  | 0.30   | 0.31   | 1.000        |
| 3    | <i>LPL</i>        | A | G | 3/12/8    | 0.52   | 0.48   | 1.000        |
| 4    | <i>CSN1S1</i>     | T | C | 8/37/30   | 0.49   | 0.46   | 0.616        |
| 4    | <i>CSN3</i>       | T | C | 3/37/35   | 0.49   | 0.41   | 0.096        |
| 4    | <i>SCD</i>        | C | A | 4/20/51   | 0.27   | 0.30   | 0.267        |
| 4    | <i>LPL</i>        | A | G | 16/29/30  | 0.39   | 0.48   | 0.095        |
| 5    | <i>CSN1S1</i>     | T | C | 42/95/68  | 0.46   | 0.49   | 0.398        |
| 5    | <i>CSN3</i>       | T | C | 27/73/105 | 0.36   | 0.43   | <b>0.021</b> |
| 5    | <i>SCD</i>        | C | A | 10/84/111 | 0.41   | 0.38   | 0.274        |
| 5    | <i>LPL</i>        | A | G | 36/107/62 | 0.52   | 0.49   | 0.477        |
| 6    | <i>CSN1S1</i>     | T | C | 25/47/34  | 0.44   | 0.50   | 0.327        |
| 6    | <i>CSN3</i>       | T | C | 24/46/36  | 0.43   | 0.49   | 0.238        |
| 6    | <i>SCD</i>        | C | A | 5/31/70   | 0.29   | 0.31   | 0.533        |
| 6    | <i>LPL</i>        | A | G | 14/45/47  | 0.42   | 0.45   | 0.524        |
| 7    | <i>CSN1S1</i>     | T | C | 19/21/23  | 0.33   | 0.50   | <b>0.011</b> |
| 7    | <i>CSN3</i>       | T | C | 15/25/23  | 0.40   | 0.49   | 0.129        |
| 7    | <i>SCD</i>        | C | A | 8/20/35   | 0.32   | 0.41   | 0.117        |
| 7    | <i>LPL</i>        | A | G | 12/32/19  | 0.51   | 0.49   | 1.000        |
| 8    | <i>CSN1S1</i>     | T | C | 8/14/8    | 0.47   | 0.50   | 0.723        |
| 8    | <i>CSN3</i>       | C | T | 6/15/9    | 0.50   | 0.50   | 1.000        |
| 8    | <i>SCD</i>        | C | A | 3/7/20    | 0.23   | 0.34   | 0.101        |
| 8    | <i>LPL</i>        | A | G | 2/10/18   | 0.33   | 0.36   | 0.632        |

<sup>1</sup>SNP is: *CSN1S1* = AJ005430:c.578C>T; *CSN3* = HQ677596:c.536C>T; *SCD* = FM876222:g.133A>C; *LPL* = AWWX01438720.1:g14229A>G.

**Table S2.** P-values for fixed effect included in the statistical model for the six analyzed traits.

| Milk Trait <sup>1</sup> | Gene <sup>2</sup> | Year   | Sea    | NL     | DIM    | Dim(Genotype) | Genotype(NL) |
|-------------------------|-------------------|--------|--------|--------|--------|---------------|--------------|
| dMY<br>(kg/d)           | <i>CSN1S1</i>     | <0.001 | <0.001 | <0.001 | <0.001 | 0.044         | 0.003        |
|                         | <i>CSN3</i>       | <0.001 | <0.001 | <0.001 | <0.001 | 0.600         | <0.001       |
|                         | <i>SCD</i>        | <0.001 | <0.001 | <0.001 | <0.001 | 0.566         | 0.241        |
|                         | <i>LPL</i>        | <0.001 | <0.001 | <0.001 | <0.001 | 0.081         | 0.463        |
| dFY<br>(kg/d)           | <i>CSN1S1</i>     | <0.001 | 0.003  | <0.001 | <0.001 | 0.075         | <0.001       |
|                         | <i>CSN3</i>       | <0.001 | 0.004  | <0.001 | <0.001 | 0.592         | <0.001       |
|                         | <i>SCD</i>        | <0.001 | 0.004  | <0.001 | <0.001 | 0.221         | 0.509        |
|                         | <i>LPL</i>        | <0.001 | 0.005  | <0.001 | <0.001 | 0.460         | 0.258        |
| dPY<br>(kg/d)           | <i>CSN1S1</i>     | <0.001 | <0.001 | <0.001 | <0.001 | 0.030         | 0.009        |
|                         | <i>CSN3</i>       | <0.001 | <0.001 | <0.001 | <0.001 | 0.323         | 0.001        |
|                         | <i>SCD</i>        | <0.001 | <0.001 | <0.001 | <0.001 | 0.385         | 0.520        |
|                         | <i>LPL</i>        | <0.001 | <0.001 | <0.001 | <0.001 | 0.206         | 0.778        |
| dFP<br>(g/100g)         | <i>CSN1S1</i>     | <0.001 | 0.297  | <0.001 | <0.001 | 0.587         | 0.011        |
|                         | <i>CSN3</i>       | <0.001 | 0.353  | <0.001 | <0.001 | 0.286         | 0.196        |
|                         | <i>SCD</i>        | <0.001 | 0.304  | <0.001 | <0.001 | 0.190         | 0.239        |
|                         | <i>LPL</i>        | <0.001 | 0.229  | 0.001  | <0.001 | 0.051         | 0.010        |
| dPP<br>(g/100g)         | <i>CSN1S1</i>     | <0.001 | 0.038  | <0.001 | <0.001 | 0.093         | 0.047        |
|                         | <i>CSN3</i>       | <0.001 | 0.039  | <0.001 | <0.001 | 0.063         | 0.094        |
|                         | <i>SCD</i>        | <0.001 | 0.017  | <0.001 | <0.001 | 0.433         | 0.038        |
|                         | <i>LPL</i>        | <0.001 | 0.035  | <0.001 | <0.001 | 0.061         | 0.159        |
| SCS<br>(log(SCC/100)+3) | <i>CSN1S1</i>     | <0.001 | 0.130  | <0.001 | <0.001 | 0.038         | 0.000        |
|                         | <i>CSN3</i>       | <0.001 | 0.153  | <0.001 | <0.001 | 0.025         | 0.085        |
|                         | <i>SCD</i>        | <0.001 | 0.133  | <0.001 | <0.001 | 0.222         | 0.001        |
|                         | <i>LPL</i>        | <0.001 | 0.109  | <0.001 | <0.001 | 0.909         | 0.100        |
| UREA<br>(mg/dL)         | <i>CSN1S1</i>     | <0.001 | 0.002  | <0.001 | <0.001 | 0.228         | 0.065        |
|                         | <i>CSN3</i>       | <0.001 | 0.003  | <0.001 | <0.001 | 0.039         | 0.326        |
|                         | <i>SCD</i>        | <0.001 | 0.003  | <0.001 | <0.001 | 0.771         | 0.442        |
|                         | <i>LPL</i>        | <0.001 | 0.004  | <0.001 | <0.001 | 0.538         | 0.304        |

<sup>1</sup> dMY=daily milk yield, dFY = daily fat yield, dPY = daily protein yield, dFP = daily fat percent, dPP = daily protein percent. <sup>2</sup>SNP is: *CSN1S1* = AJ005430:c.578C>T; *CSN3* = HQ677596:c.536C>T; *SCD* = FM876222:g.133A>C; *LPL* = AWWX01438720.1:g14229A>G.
